# Supplementary material
Source: PubMed Central journal article supplement (PMC2714998)

# Ihara et al., Figure S1

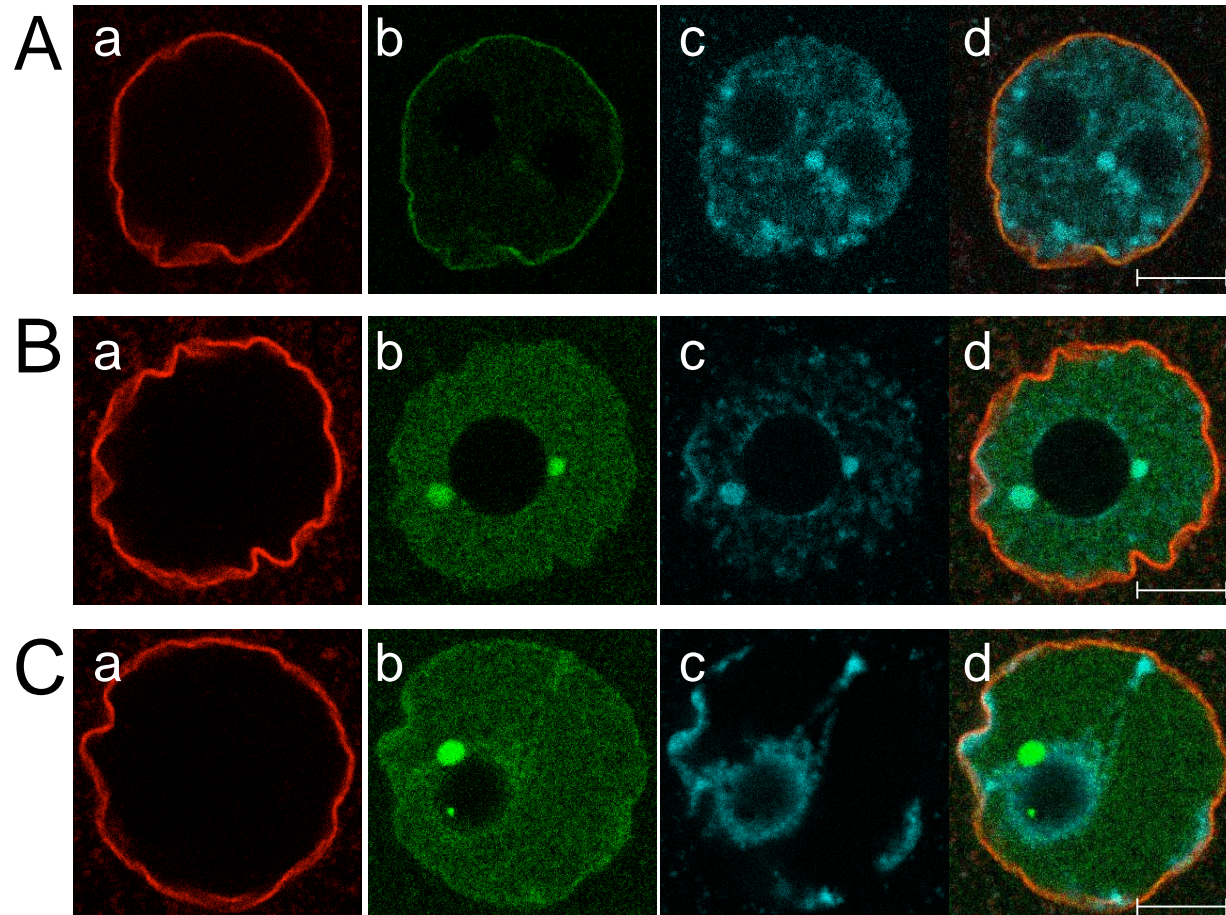

Ihara et al., Figure S2

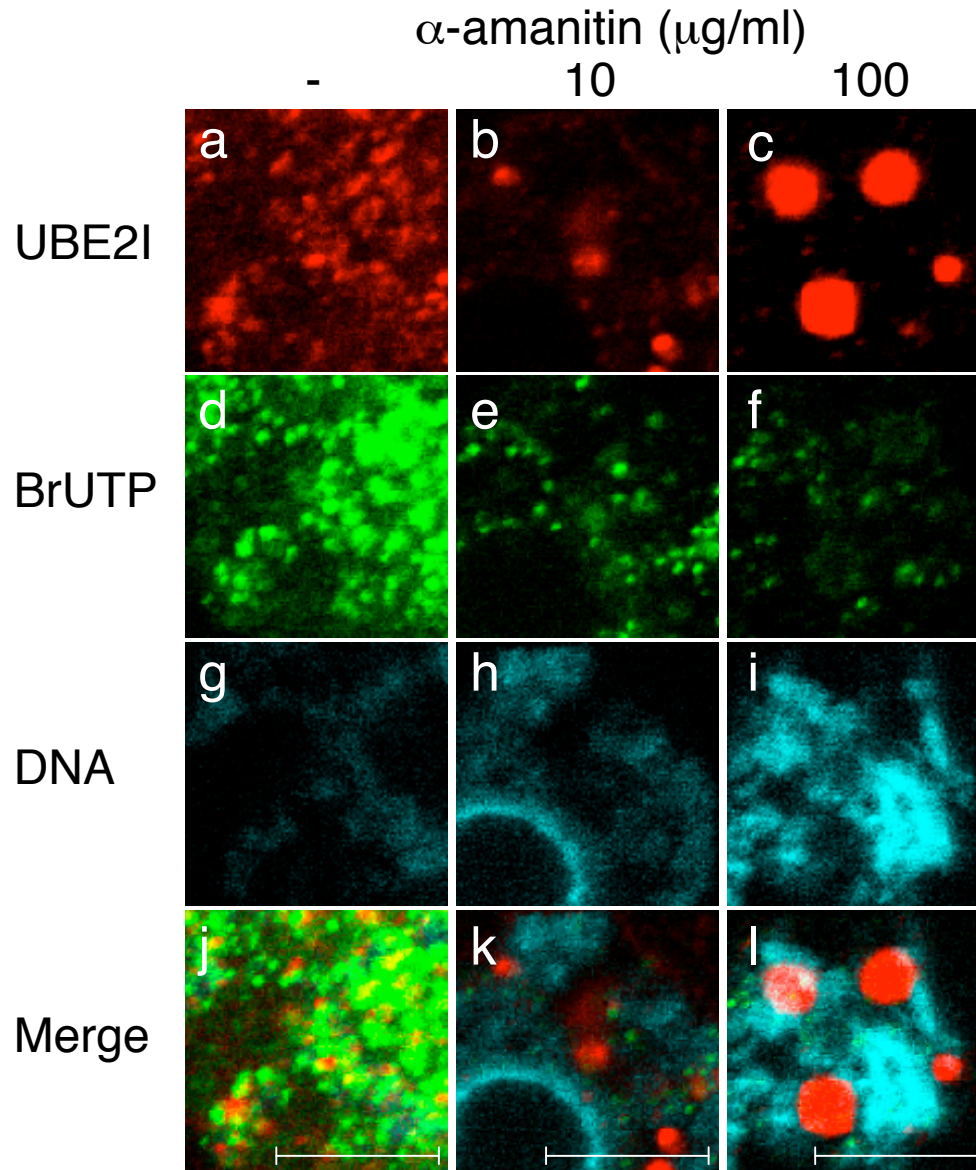

Ihara et al., Figure S3

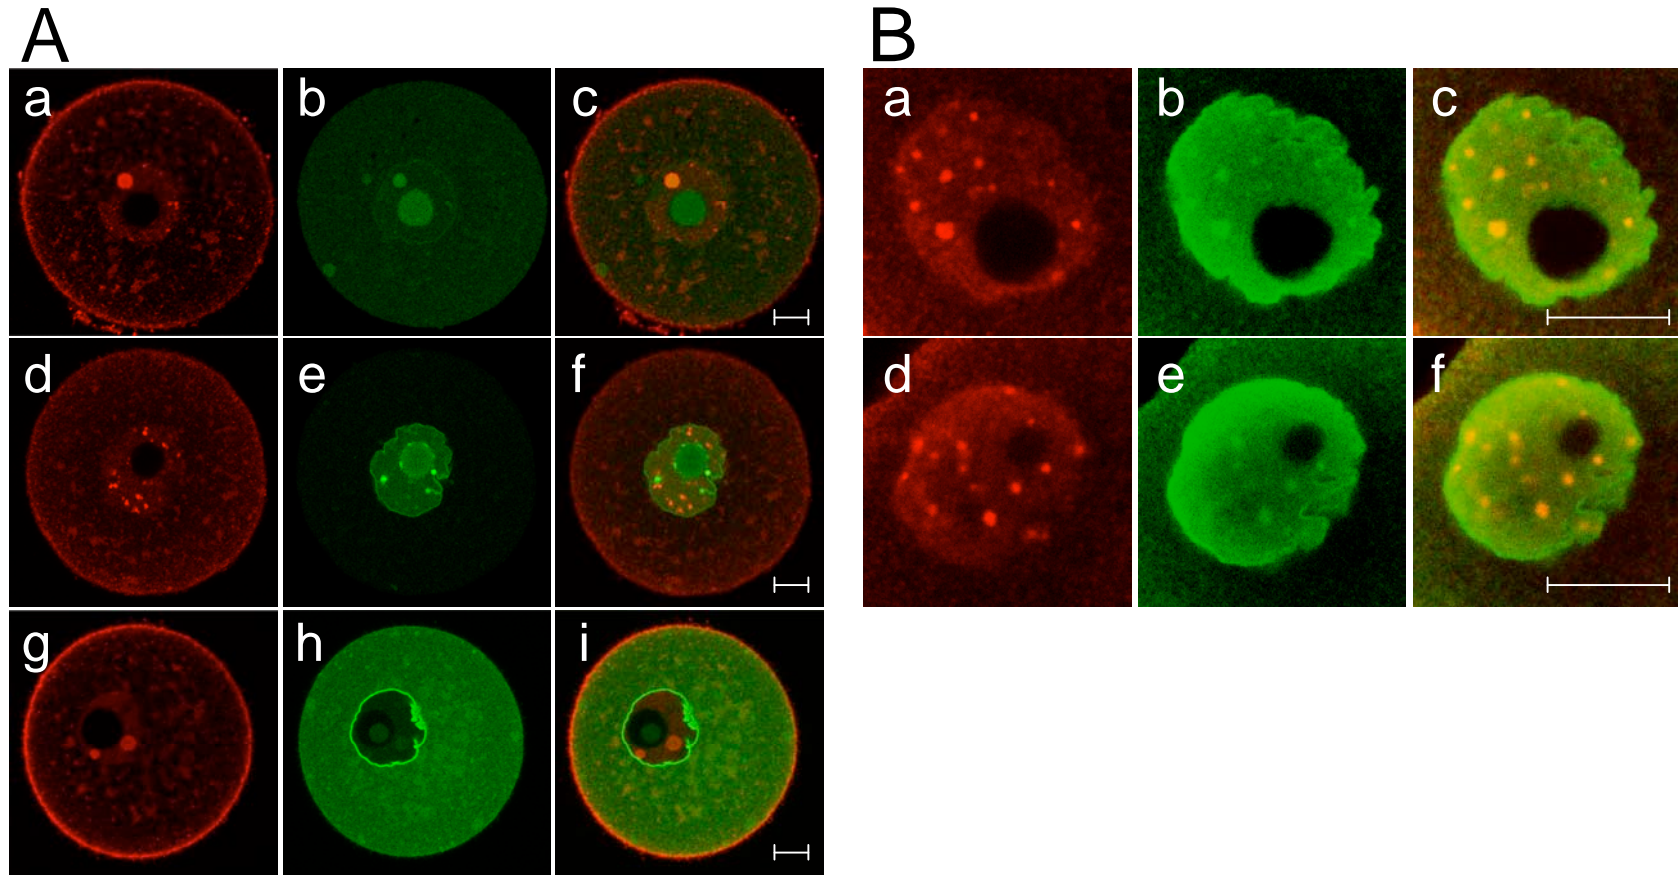

Ihara et al., Figure S4

**A**

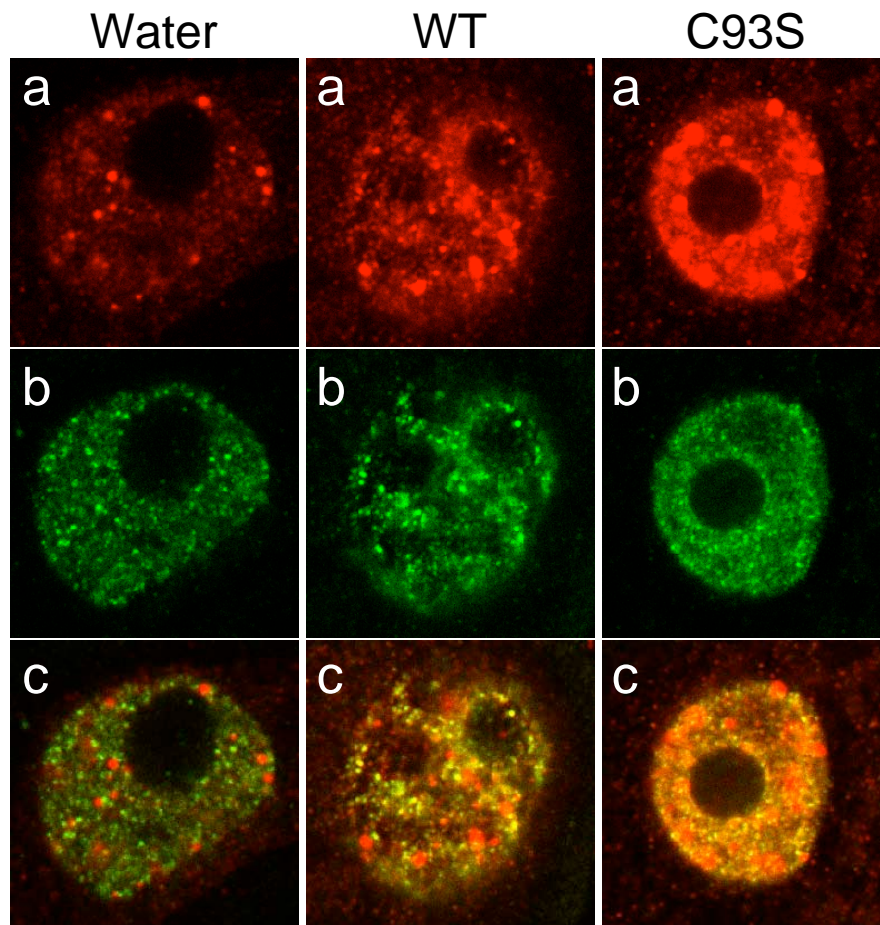

**B**

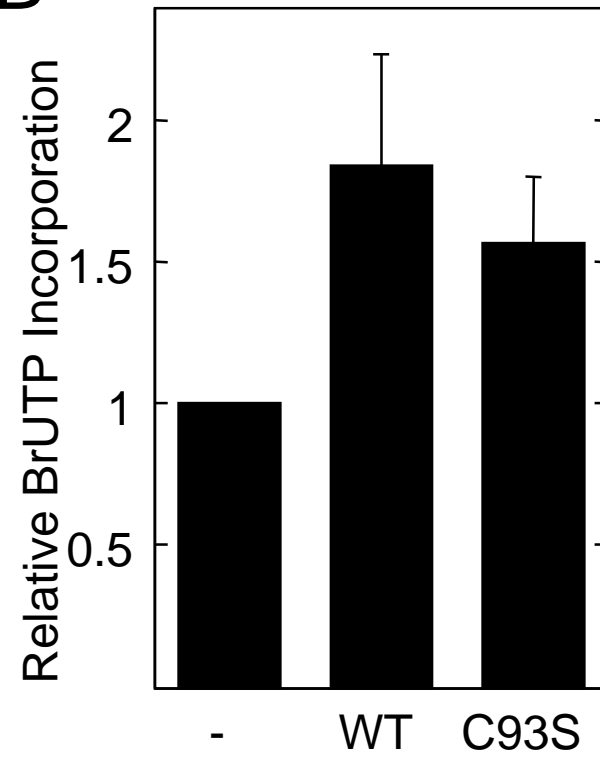

Supplement: 108.070474_1.pdf [file 108.070474_1.pdf]
